# Supplementary material for: Macrophage polarization state affects lipid composition and the channeling of exogenous fatty acids into endogenous lipid pools
Source: PubMed Central journal article supplement (PMC8604758; doi:10.1016/j.jbc.2021.101341), 2021-10-23
Supplement: mmc1.pdf [file mmc1.pdf]

## **Macrophage polarization state affects lipid composition and the channelling of exogenous fatty acids into endogenous lipid pools**

Pooranee K. Morgan<sup>1,2,5</sup>, Kevin Huynh<sup>1,5</sup>, Gerard Pernes<sup>1,5</sup>, Paula M. Miotto<sup>3</sup>, Natalie A. Mellett<sup>1</sup>, Corey Giles<sup>1</sup>, Peter J. Meikle<sup>1</sup>, Andrew J. Murphy<sup>1,4,6</sup> and Graeme I. Lancaster<sup>1,4,6</sup>

Running Title: Macrophage polarization state and lipid metabolism

Keywords: macrophage, fatty acid metabolism, phospholipid metabolism, sphingolipid, cell metabolism

<sup>1</sup> Baker Heart and Diabetes Institute, 75 Commercial Road, Melbourne, Australia, 3004.

<sup>2</sup> School of Life Sciences, La Trobe University, Melbourne, Australia, 3086.

<sup>3</sup> Department of Anatomy and Physiology, School of Biomedical Sciences, University of Melbourne, Melbourne, Australia, 3010.

<sup>4</sup> Department of Immunology, Monash University, Melbourne, Australia, 3004.

<sup>5</sup> These authors contributed equally to this work.

<sup>6</sup> Co-address for correspondence

Supplementary Figure 1

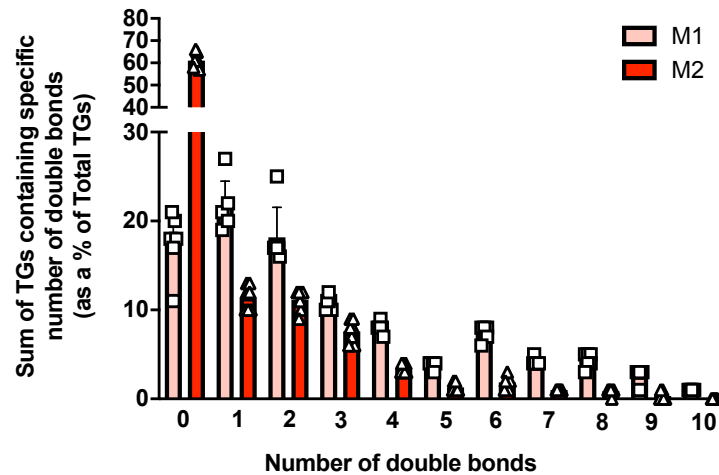

**Supplementary Figure 1. The composition of the TG pool is different in M1 and M2 macrophages.** TG composition was assessed in M1 and M2 BMDM by expressing the sum all of the individual SIM TG species of a given saturation status as a % of total TG. Data are shown as mean  $\pm$  S.D. (error bars) as well individual data points from each biological replicate.

## Supplementary Figure 2

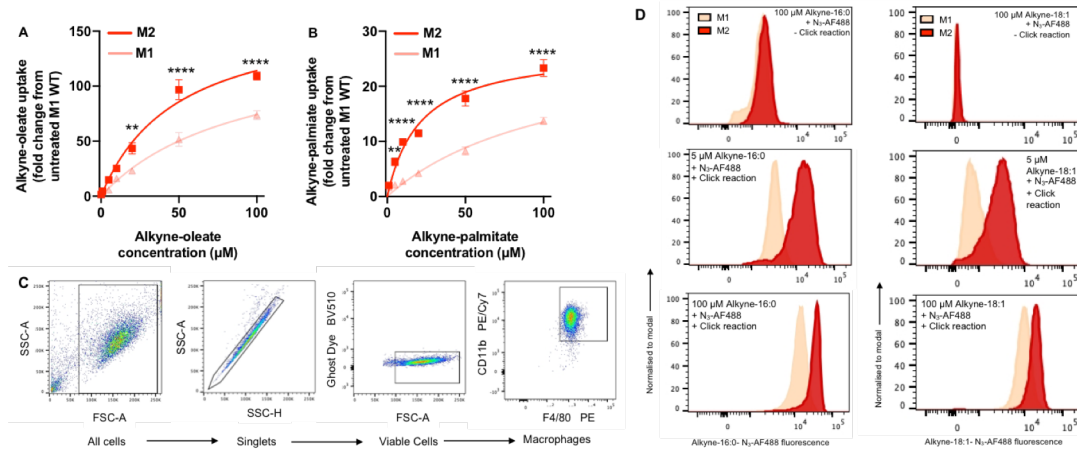

**Supplementary Figure 2. Fatty acid uptake is higher in M2 relative to M1 macrophages.** *A* and *B*, Alkyne fatty acid uptake was assessed in M1 and M2 BMDM following 10 min of treatment with either alkyne-palmitate (16:0) or alkyne-oleate (18:1) at the indicated doses. *C* and *D*, Illustrate the gating strategy used to define viable macrophages following treatment (*C*) and provide representative histograms of the typical fluorescence changes observed following treatment with the alkyne fatty acids in the presence and absence of  $\text{CuSO}_4$ , which is required to catalyze the click reaction that initiates azide/alkyne conjugation (*D*). 2-way ANOVA with Tukey's HSD test was used to determine statistically significant differences. \*\* and \*\*\*\* indicate significant differences between pairwise comparisons of M1 vs. M2 at individual alkyne fatty acid doses at the following significance level:  $p < 0.01$  and  $p < 0.00001$ , respectively.  $N = 3$  biological replicates in all groups. Data are shown as mean  $\pm$  S.D. (error bars).

### Supplementary Figure 3

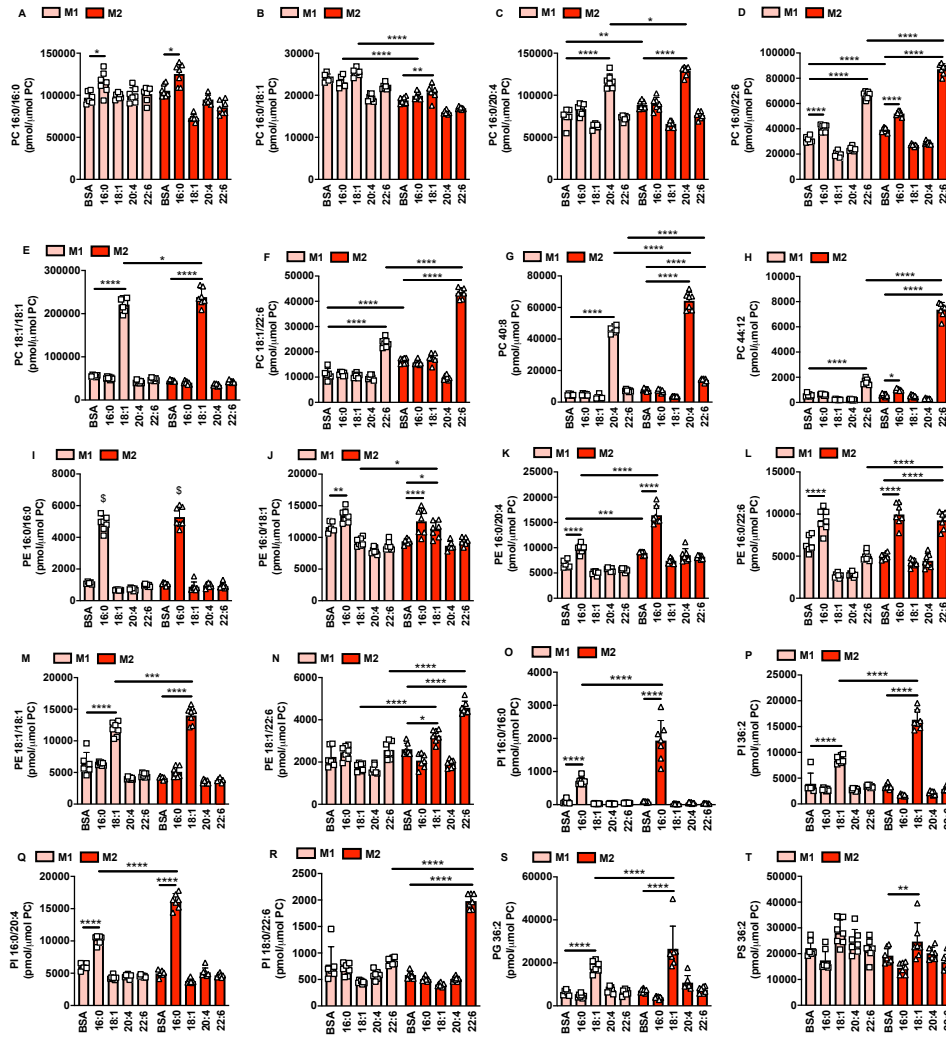

**Supplementary Figure 3. Exogenous fatty acids increase glycerophospholipid levels to a greater extent in M2 relative to M1 macrophages.** M1 and M2 BMDM were treated individually for 4 hrs with 200  $\mu$ M palmitic acid (16:0), oleic acid (18:1), arachidonic acid (20:4), docosahexaenoic acid (22:6), or vehicle control (BSA). Samples were analysed by MS lipidomics and the levels of individual phosphatidylcholine (PC) (*A-H*), phosphatidylethanolamine (PE) (*I-N*), phosphatidylinositol (PI) (*O-R*), phosphatidylglycerol (PG) (*S*), and phosphatidylserine (*T*) glycerophospholipid species were determined. 2-way ANOVA with Tukey's HSD test was used to determine statistically significant differences. \*, \*\*, \*\*\*, and \*\*\*\* indicate significant differences between pairwise comparisons of the indicated groups at the following significance level:  $p < 0.05$ ,  $p < 0.01$ ,  $p < 0.001$ , and  $p < 0.00001$ , respectively. \$\$\$\$ indicates a significant difference (main effect) between 16:0 and BSA treated BMDM at the following significance level:  $p < 0.00001$ . Data are shown as mean  $\pm$  S.D. (error bars) as well as with individual data points from each biological replicate.

## Supplementary Figure 4

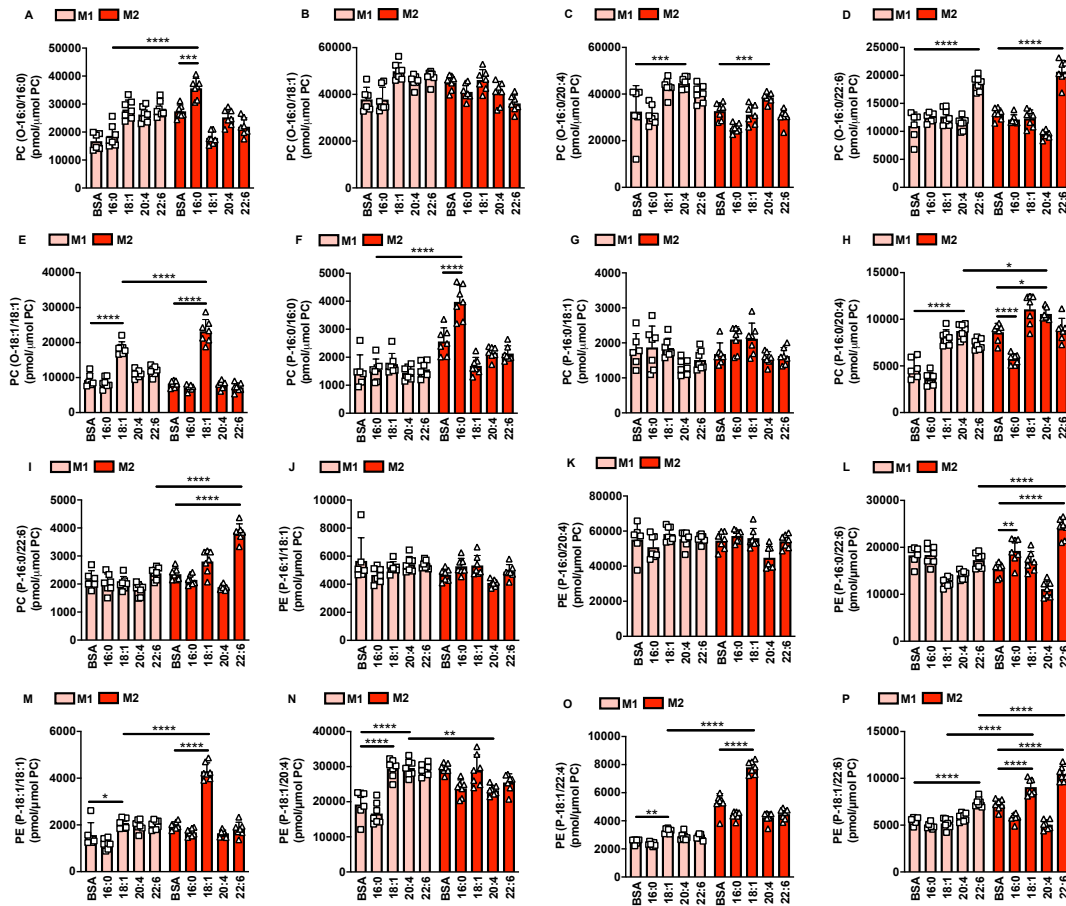

**Supplementary Figure 4. Exogenous fatty acids increase ether and vinyl-ether glycerophospholipid levels to a greater extent in M2 relative to M1 macrophages.** M1 and M2 BMDM were treated individually for 4 hrs with 200  $\mu$ M palmitic acid (16:0), oleic acid (18:1), arachidonic acid (20:4), docosahexaenoic acid (22:6), or vehicle control (BSA). Samples were analysed by MS lipidomics and the levels of individual ether PC (A-E), vinyl-ether PC (F-I), and vinyl-ether PE (J-P). were determined. 2-way ANOVA with Tukey's HSD test was used to determine statistically significant differences. \*, \*\*, \*\*\*, and \*\*\*\* indicate significant differences between pairwise comparisons of the indicated groups at the following significance level:  $p < 0.05$ ,  $p < 0.01$ ,  $p < 0.001$ , and  $p < 0.00001$ , respectively. Data are shown as mean  $\pm$  S.D. (error bars) as well as with individual data points from each biological replicate.

## Supplementary Figure 5

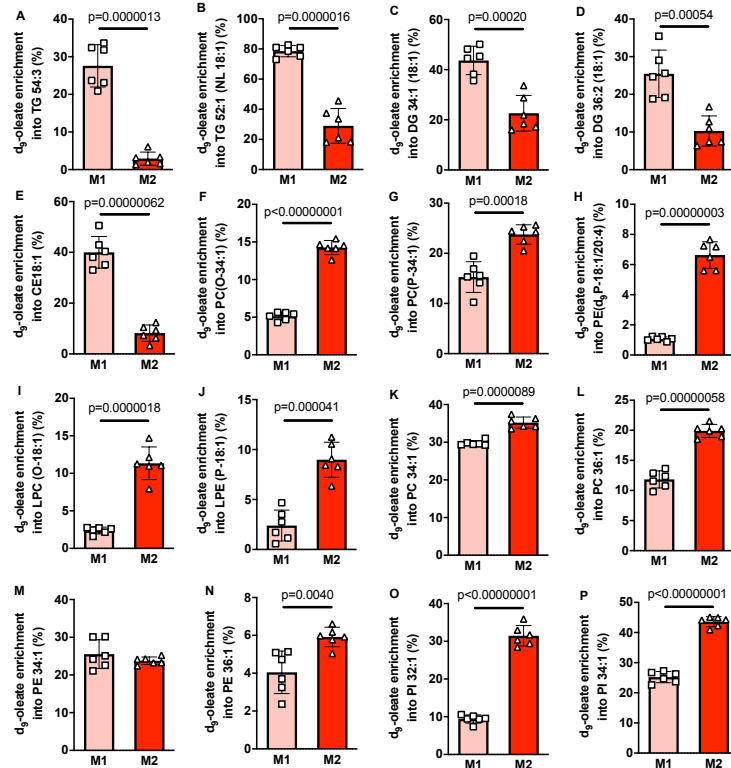

**Supplementary Figure 5. Deuterated ( $d_9$ )-oleic acid is enriched within neutral lipids in M1 macrophages and within glycerophospholipids within M2 macrophages.** M1 and M2 BMDM were treated with  $d_9$ -oleic acid for 4 hrs and enrichment within individual TG (A-B), DG (C and D), CE (E), ether PC (F), vinyl-ether PC and PE (G-H), ether lyso (L)PC (I), vinyl-ether LPE (J), PC (K and L), PE (M and N), and PI (O and P) species was determined by MS lipidomics. Data was analysed by unpaired t-test with exact p values indicated. Data are shown as mean  $\pm$  S.D. (error bars) as well as with individual data points from each biological replicate.
